# Supplementary material for: High-grade cervical disease and cervical cancer in women aged 50 years and older compared with younger women: examining prevalence by HIV status in two large prospective cohorts in Botswana
Source: PubMed Central journal article supplement — BMJ Open. 2024 Oct 29;14(10):e089375. doi: 10.1136/bmjopen-2024-089375 (PMC11529474; doi:10.1136/bmjopen-2024-089375), 2024-10-29
Supplement: bmjopen-2024-089375.reviewer_comments.pdf [file bmjopen-2024-089375.reviewer_comments.pdf]

## PEER REVIEW HISTORY

BMJ Open publishes all reviews undertaken for accepted manuscripts. Reviewers are asked to complete a checklist review form and are provided with free text boxes to elaborate on their assessment. These free text comments are reproduced below.

### ARTICLE DETAILS

#### Title (Provisional)

High-grade cervical disease and cervical cancer in women aged 50 years and older compared to younger women: Examining prevalence by HIV status in two large prospective cohorts in Botswana

#### Authors

Luckett, Rebecca; Zhang, Bessie X; Gompers, Annika; George, Jessica; Modest, Anna; Bazzett-Matabele, Lisa; Vuylsteke, Peter; Kula, Maduke; Monare, Barati; Botha, Matthys H; Shapiro, Roger; Ramogola-Masire, Doreen; Grover, Surbhi

---

### VERSION 1 - REVIEW

---

|                    |                                       |
|--------------------|---------------------------------------|
| <b>Reviewer</b>    | <b>1</b>                              |
| <b>Name</b>        | <b>Carlander, Christina</b>           |
| <b>Affiliation</b> | <b>Karolinska University Hospital</b> |
| <b>Date</b>        | <b>28-Jul-2024</b>                    |
| <b>COI</b>         | <b>None</b>                           |

---

I am happy with the replies and changes performed.

I have no further comments.

---

|                    |                                                  |
|--------------------|--------------------------------------------------|
| <b>Reviewer</b>    | <b>2</b>                                         |
| <b>Name</b>        | <b>John, Denny</b>                               |
| <b>Affiliation</b> | <b>MS Ramaiah University of Applied Sciences</b> |
| <b>Date</b>        | <b>24-Aug-2024</b>                               |
| <b>COI</b>         | <b>None</b>                                      |

---

The manuscript is acceptable in the current form.

---

### VERSION 1 - AUTHOR RESPONSE
